# Supplementary material
Source: publisher figshare collection journal article supplement (https://gsapubs.figshare.com/ndownloader/files/23303792)
Supplement: Supplementary file 1 [file 23303792]

## Sheet: Supplement Cretaceous Vert
Supplemental Table 1. Chemical composition of Cretaceous igneous rocks, Tecolatlan, Mexico
Sample	JT-K42	JT-K41	JT-K40	JT-K38	JT-K36	JT-K35	Tena-K4	JT-K87	JT-K97	JT-K104	JT-K88	JT-K130	JT-K37	JT-K110	JT-K76	JT-K30	JT-K22	JT-K89	JT-C
Description	A rhyolite ash-flow tuff	B rhyolite ash-flow tuff	C rhyolite ash-flow tuff	D rhyolite ash-flow tuff	E rhyolite ash-flow tuff	F rhyolite ash-flow tuff	Rhyolite ash-flow tuff	Rhyolite ash-flow tuff	Silicified dacite lava	Silicified dacite lava	Silicified dacite ash-flow tuff	Dacite ash-flow tuff	Trachy- andesite lava	Trachy- andesite lava	Trachy- andesite lava	Trachy- andesite lava	Trachy- basalt lava	Trachy- basalt lava	Diorite of La Florida
Weight percent normalized to 100% on a volatile-free basis
SiO2	71.6672	78.32	74.1174	74.5825	71.76	79.59	75.8876	81.7682	79.18	82.73	72.54	63.3373	58.9759	58.0942	55.4	54.8655	51.57	50.36	61.9
TiO2	0.350035	0.14	0.250025	0.19998	0.42	0.38	0.220022	0.20002	0.5	0.54	0.47	1.05979	1.28013	0.839916	1.14	1.28013	1.97	1.48	0.73
Al2O3	14.9415	12.34	13.3713	14.2486	14.53	11.23	18.6719	10.281	11.54	8.86	13.9	18.1664	17.1317	18.5281	17.8	17.2917	18.39	18.27	15.92
Fe2O3*	2.48025	1.36	1.73017	1.38986	3.06	2.07	1.57016	1.20012	2.18	0.41	3.95	5.21896	7.33073	8.60914	7.54	8.22082	11.53	10.83	6.74
MnO	0.080008	0.05	0.110011	0.189981	0.05	0.03	0.020002	0.040004	0.02	0	0.04	0.079984	0.130013	0.149985	0.09	0.150015	0.12	0.08	0.12
MgO	0.690069	1.08	0.370037	0.89991	0.99	0.18	0.080008	0.160016	0.33	0.05	0.62	2.23955	2.22022	4.31957	3.31	2.87029	2.39	4.56	3.02
CaO	3.68037	2.63	2.58026	1.83982	1.22	0.16	0.020002	0.170017	0.24	0.01	0.68	3.96921	5.18052	1.9798	6.25	6.9507	8.21	8.67	6.13
Na2O	3.35034	3.06	6.65067	3.29967	6.7	6.2	0.930093	5.9606	5.85	0.22	5.91	2.91942	4.9705	5.82942	4.32	5.50055	4.1	3.53	3.24
K2O	2.67027	0.99	0.770077	3.29967	1.16	0.09	2.59026	0.150015	0.04	7.18	1.6	2.67946	2.31023	1.45985	3.36	2.49025	1.17	1.64	2.06
P2O5	0.090009	0.03	0.050005	0.049995	0.11	0.07	0.010001	0.070007	0.12	0	0.29	0.329934	0.470047	0.189981	0.79	0.380038	0.55	0.58	0.14
Total	100	100	100	100	100	100	100	100	100	100	100	100	100	100	100	100	100	100	100
LOI	3.28	3.72	2.65	3.16	2.42	1.06	5.18	0.67	0.88	1.85	1.39	4.57	1.67	3.91	2.45	3.42	2.31	1.62	0.98
Parts per million
F	437	523	393	568	471	329	100	294	<100	<100	392	800	763	342	1563	769	709	980	<100
S	138	100	258	139	300	51	<40	45	<40	<40	112	2300	54	<40	77	111	68	98	111
Cl	118	124	127	118	117	115	<75	125	130	122	120	600	126	132	134	132	127	153	126
Sc	5	2.3	4.4	2.4	7.7	5.6	4	3.7	15	3	6.1	10	17.8	22	18.6	24.1	29.5	23.3	22
V	22.6	11.2	25.5	6.1	38.6	25.6	2	7.3	85	<2	50.8	55	118.7	165	100.2	236.6	220.2	236.3	166
Cr	3.7	3.4	3.9	4.4	2.4	0.5	0.5	0.5	1	7	1	5	2.5	14	138.6	33.4	174.2	52.8	26
Ni	4.1	4.3	5.7	0.5	12.3	12.9	2	11.1	13	10	16.7	11	6.1	17	88.6	19.8	144.6	47.6	13
Cu	2.1	4.1	0.5	0.5	0.5	0.5	0.5	0.5	128	8	0.5	7	0.5	8	45.9	61.1	34.3	26.5	21
Zn	15.9	0.5	6.1	50.8	53.6	23.8	0.5	1	40	<1	11.4	77	66.7	150	94.3	77.5	86.9	75.5	61
Ga	16.6	9.5	12.5	14.5	16.3	13.2	21	10.8	9	<1	11.4	21	20.3	20	24.1	17.2	22.1	20.6	17
Rb	39	25.7	32	68.7	42.6	6.9	56	13.9	6	147	26	63	50.9	36	36.2	43.3	9.4	27.6	53
Sr	236.6	116	99	114.1	310.9	50	37	43.2	77	307	189.2	449	579.9	460	1621.4	531.7	862.5	925.8	354
Y	25.4	26.9	37.9	22.7	34.1	42.1	45	33.8	28	1	34.2	44	34.9	22	21.1	31	30.7	22.3	24
Zr	172.1	118.9	198.5	144	249.1	337.7	193	180.2	173	64	176.3	429	210.2	112	276.9	164.3	190.1	152.1	154
Nb	9.8	12.3	9.2	12.8	13.2	16	25	7.2	10	9	9.6	28	11.5	6	11.1	8.5	14.5	9.4	7
Ba	879	441	285	1026	1115	84	408	77	49	24765	586	758	780	388	1588	603	834	478	676
La	25	23	60	25	29	27	22	45	21	39	33	33	27	9	57	22	28	19	14
Ce	54	40	99	44	53	54	73	85	26		54	83	57	18	108	42	63	47	27
Nd	25	21	41	22	24	25	36	36	15	10	24	37	29	12	47	22	28	23	17
Sm	6	6	8	6	4	5	7	7	4	4	5	7	5	2	6	4	4	3	3
Pb	9.1	3.9	10	10.3	10	2.2	12	2.5	3	<2	11.9	17	9.5	8	13.7	10.1	6.8	4.9	8
Th	8.4	8.6	28.1	2	6.5	4.2	14	24.2	3	0.9	7.7	6	2.2	0.9	3	3.7	4.1	1.5	6
U	0.9	0.9	0.9	0.9	0.9	0.9	0.9	0.9	<1	4	1.4	0.9	1.3	2	4.1	1.15	2.8	2.5	2

## Sheet: Supplement Neogene Vert
Supplemental Table 2. Chemical composition of Neogene volcanic rocks, Tecolatlan, Mexico
Sample	JT-K99	JT-K107	JT-K96	JT-A	JT-K117	JT-K144	JT-K55	Tena-K2	JT-K123	Tena-K1	Tena-K3	JT-K53	JT-K129	JT-K19	JT-K62	JT-B	JT-K13	JT K120	JT-K73	JT-K119	JT-K34	JT-K50	JT-K72	JT K101A	JT-K125	JT-K101b	JT-K128	JT-K24	JT-K118	JT-K25	JT-D	JT-K121	JT K115	JT-K23
Description	Rhyolite fallout tuff	Dacite fallout tuff	Rhyolite lava	Rhyolite lava	Andesite lava	Andesite lava	Basaltic andesite scoria	Basaltic andesite lava	Basaltic andesite lava	Basaltic andesite lava	Basaltic andesite lava	Basaltic andesite lava	Basalt lava	Trachy- andesite lava	Trachy- andesite lava	Trachy- andesite lava	Trachy- andesite lava	Trachy- andesite lava	Trachy- andesite lava	Trachy- andesite lava	Trachy- andesite lava	Basaltic trachyandesite lava	Basaltic trachyandesite lava	Basaltic trachyandesite lava	Basaltic trachyandesite lava	Basaltic trachyandesite lava	Basaltic trachyandesite lava	Basaltic trachyandesite lava	Trachy-basalt lava	Trachy-basalt lava	Trachy-basalt lava	Trachy-basalt lava	Minette	Minette
Notes		Altered	Calc-alkaline	Calc-alkaline	Calc-alkaline	Calc-alkaline	Calc-alkaline	Calc-alkaline	Calc-alkaline	Calc-alkaline	Calc-alkaline	Calc-alkaline	Calc-alkaline	Transitional	Transitional	Transitional	Transitional	Transitional	Transitional	Transitional	Transitional	Transitional	Transitional	Transitional	Transitional	Transitional	Transitional	Transitional	Transitional	Transitional	Transitional	Transitional	Minette	Minette
Weight percent normalized to 100% on a volatile-free basis
SiO2	71.2171	60.196	70.14	69.18	58.1	57.8058	56.384	56.3631	55.97	55.131	54.7	52.49	51.4249	60.2721	59.9	58.83	56.7857	56.56	55.76	56.2344	56.07	56.0556	55.4955	54.38	53.4047	53.22	52.8906	51.77	52.07	51.7448	51.74	51.1149	51.14	53.2841
TiO2	0.260026	0.570057	0.53	0.45	0.67	0.660066	1.22905	0.919724	0.6	0.590118	0.59	1.34	0.749925	0.830166	0.68	0.94	0.910091	0.89	0.94	0.859914	1.07	1.28013	0.70007	1.25	1.43986	1.12	1.71034	1.79	1.97	1.47985	1.96	1.59984	1.39	1.73178
Al2O3	17.7318	28.7129	15.78	15.53	17.57	18.2418	19.6445	17.2648	16.01	16.1632	16.19	16.99	16.3284	16.2633	17.78	16.96	16.2116	17.03	16.76	16.3784	16.43	17.8018	17.0417	19.12	16.6083	18.81	15.7231	16.12	16.35	16.6583	16.31	19.4581	15.5	15.0053
Fe2O3*	3.11031	4.80048	3.29	2.69	6.77	6.52065	7.22194	9.13726	7.11	7.62152	7.49	8.86	9.0291	4.91098	5.66	6.13	6.38064	6.51	7.04	6.18938	6.94	7.80078	6.84068	8.24	9.92901	8.25	10.6121	10.81	10.33	9.46905	10.49	9.22908	9.56	8.849
MnO	0.040004	0.080008	0.02	0.08	0.1	0.10001	0.101574	0.079976	0.12	0.110022	0.12	0.12	0.139986	0.070014	0.06	0.06	0.090009	0.09	0.1	0.069993	0.1	0.110011	0.110011	0.12	0.129987	0.12	0.160032	0.15	0.16	0.159984	0.16	0.109989	0.12	0.200634
MgO	2.48025	0.80008	0.24	0.75	5.07	5.0105	3.19959	4.42867	7.89	7.80156	8.21	7.15	8.9991	4.81096	2.54	2.4	4.83048	2.8	4.82	4.41956	4.07	3.38034	5.9706	3.47	4.83952	4.71	6.20124	6.01	5.86	6.44936	6.04	4.67953	6.36	5.70222
CaO	1.73017	0.950095	0.21	2.2	6.71	7.27073	7.61808	5.28841	7.31	7.4915	7.83	7.89	8.34917	7.14143	6.31	8.29	6.51065	7.13	7.04	7.83922	6.72	6.87069	7.51075	6.83	7.41926	7.44	7.85157	7.73	8.15	8.85911	8.08	7.61924	7.57	7.70855
Na2O	1.49	2.10021	4.73	2.98	3.7	3.18032	3.23007	5.29841	3.55	3.65073	3.48	3.63	3.55964	4.10082	4.97	3.26	5.06051	5.76	4.56	4.82952	4.61	4.11041	4.67047	4.33	3.46965	3.53	2.93059	3.73	3.29	3.57964	3.34	4.19958	5.53	3.93875
K2O	1.88	1.71017	4.73	5.96	1.13	1.05011	1.10716	0.989703	1.22	1.30026	1.23	1.17	1.17988	1.33027	1.79	2.56	2.65027	2.64	2.43	2.61974	3.26	2.0402	1.38014	1.78	2.15978	2.17	1.47029	1.39	1.34	1.21988	1.37	1.61984	1.66	2.49208
P2O5	0.060006	0.080008	0.33	0.18	0.18	0.160016	0.264093	0.229931	0.22	0.140028	0.16	0.36	0.239976	0.270054	0.31	0.57	0.570057	0.59	0.55	0.559944	0.73	0.550055	0.280028	0.48	0.59994	0.63	0.45009	0.5	0.48	0.379962	0.51	0.369963	1.17	1.08765
Total	100	100	100	100	100	100	100	100	100	100	100	100	100	100	100	100	100	100	100	100	100	100	100	100	100	100	100	100	100	100	100	100	100	100
LOI	7.58	9.3	1.34	1.71	0.93	0.53	2.49	2.53	0.33	0.42	0.41	1.79	0.37	1.12	1.43	2.34	0.89	1.67	0.72	2.5	1.05	1.06	0.56	1.57	1.52	1.28	0.08	0.55	0.08	1.88	0	5.16	1.29	4.26
Parts per million
F	1400	528	607	<100	187	400	571	300	242	400	400	536	400	570	739	<100	1031	940	980	841	1539	706	503	950	900	1104	400	468	613	520	<100	1949	1140	1397
S	100	<40	<40	122	<40	<40	44	<40	<40	<40	<40	141	<40	77	156	497	60	<40	40	<40	97	25	46	<40	<40	<40	<40	32	<40	97	109	<40	<40	110
Cl	500	131	123	75	122	<75	157	100	137	<75	100	141	<75	134	124	108	138	125	134	142	152	129	123	134	<75	132	100	132	143	129	135	133	166	132
Sc	6	9	6	5	16	14	24.1	20	19	19	19	21.8	22	12.2	15.8	13	14.6	12	15.6	12	15.4	16.5	17.9	21	21	20	23	24.6	24	21.8	20	27	21	29.8
V	194	49	13	15	141	150	218.1	184	158	159	166	183.3	197	72.9	137.5	148	154.5	137	166.6	131	169.4	174.7	168	187	178	191	209	226.8	212	193.8	202	273	222	183.2
Cr	8	19	1	4	149	122	249.3	28	449	580	590	208.4	543	139.1	52	96	116	89	110	88	126.5	7.1	284	125	217	146	198	116.9	153	182.2	162	34	138	275.3
Ni	24	82	13	6	185	117	123.1	26	279	253	253	176.4	267	168.5	106.7	155	149.4	160	147.2	157	87.4	21.2	192.6	121	155	90	135	96.6	122	133.5	122	25	138	179.5
Cu	16	17	<1	0.5	32	32	47.8	45	48	44	37	38	56	40.6	31	21	45.9	25	34.5	33	47.1	15.8	38	34	42	36	35	32.6	41	43.2	35	34	49	31.5
Zn	157	95	12	59	70	69	83.8	16	85	59	58	83.8	64	65.9	75.3	87	117.2	90	102.2	98	98.1	78.9	77.9	82	85	72	85	92.4	93	82.7	85	109	175	109.3
Ga	29	37	18	17	19	20	20.7	20	18	20	19	19.2	20	22.1	22.3	22	21.7	23	21.4	21	21.3	21.2	21.1	22	20	20	20	20	19	20.2	20	21	26	21.2
Rb	61	53	119	121	18	14	15.7	16	18	15	12	13.7	13	11.3	20.4	32	41.4	35	28.6	36	35.9	28.4	16.3	16	29	27	22	22	19	18.8	20	32	17	22.6
Sr	290	154	330	302	837	918	927.5	367	900	821	828	776.3	1072	1919.4	1500.1	1466	1522.4	1463	1515.2	1390	1765.2	993.7	1369.3	1145	904	947	606	641.2	579	762.9	643	826	1746	1832.7
Y	35	47	23	27	19	20	21	24	19	21	20	24.4	22	17.9	17.2	14	16	17	18.6	18	18.9	26.7	18.1	24	28	42	33	31	30	24.9	29	34	20	19.2
Zr	560	398	386	319	141	105	160.6	111	146	129	125	161.6	128	254	208.5	299	287.9	269	237.4	258	277.3	235.8	186.3	208	235	214	192	196.8	182	162.1	196	204	222	266.7
Nb	17	38	16	16	7	4	14.3	6	5	4	4	13.7	4	8.6	7.2	10	10.8	10	9.9	10	11.4	14.7	6.6	10	13	12	14	16	20	13.7	20	11	18	18
Ba	1073	838	1327	1262	595	395	552	456	598	445	489	561	494	595	1543	1004	1073	1101	1051	1073	1533	672	879	1173	934	1085	607	564	695	555	529	530	1149	1414
La	17	42	45	39	13	9	15	7	15	9	11	17	10	28	31	23	33	34	35	32	52	25	18	35	30	62	22	26	25	22	27	19	58	70
Ce	93	155	79	78	29	20	38	17	32	23	24	43	27	82	66	73	72	75	75	70	103	65	47	70	74	101	50	69	52	39	57	46	97	152
Nd	35	47	35	35	17	14	20	12	17	16	15	22	19	36	29	35	31	32	35	33	45	29	24	34	38	55	27	29	26	22	28	23	39	69
Sm	5		6	7	3	5	3	3	3	4	4	3	4	4	3	4	5	5	5	5	6	4	3	4	7	7	5	5	5	4	4	3	6	12
Pb	32	33	15	14	6	5	7.4	<1	9	6	4	5.1	8	3.9	12.4	11	10.7	11	12.6	13	13	5.9	9.6	12	7	9	5	6.7	5	5.7	7	8	16	9.3
Th	13	25	7	5	0.9	1	1.4	0.9	2	2	2	2.1	3	0.9	0.9	2	1.1	2	3.6	2	3	2.7	0.9	4	5	3	3	3.8	2	4.4	3	4	5	3.5
U	0.9	<1	3	1	3	2	2.1	2	3	3	2	2.2	3	4.6	3.2	7	4	8	3.9	5	5.4	2	3.3	5	2	4	2	2.2	3	3	1	3	6	6
